# Supplementary material for: High-performance flexible and self-powered perovskite photodetector enabled by interfacial strain engineering
Source: Royal Society of Chemistry journal article supplement (doi:10.1039/d2tc03781e), 2022-12-06
Supplement: d2tc03781e1.pdf [file d2tc03781e1.pdf]

## Supporting information for

# High-Performance Flexible and Self-Powered Perovskite Photodetector Enabled by Interfacial Strain Engineering

*Yu Deng,<sup>†</sup> Wenfang Tai,<sup>†</sup> Qi Zhang, Jun Tang, Jinpeng Li, Kai Wang, and Haomiao*

*Yu\**

Key Laboratory of Luminescence and Optical Information, Ministry of Education,  
School of Physical Science and Engineering, Beijing Jiaotong University, Beijing  
100044, China

### **\*Corresponding Author**

Haomiao Yu, E-mail: yuhaomiao@bjtu.edu.cn

<sup>†</sup> Y. D. and W. T. contributed equally to this work.

## **Experimental section**

### *Materials:*

The etched PEN/ITO substrates for flexible photodetector were purchased from Advanced Election Technology CO., Ltd. Hole transport material-PEDOT:PSS (Clevios 4083) , electron transport material-PC<sub>61</sub>BM, CH<sub>3</sub>NH<sub>3</sub>PbI<sub>3-x</sub>Cl<sub>x</sub> precursors—methylammonium iodide (MAI), lead iodide (PbI<sub>2</sub>) and lead chloride (PbCl<sub>2</sub>) were purchased from Xi'an Polymer Light Technology Corp. All the organic solvents include  $\gamma$ -butyrolactone (GBL), Dimethyl sulfoxide (DMSO, 99.9%), 1,2-dichlorobenzene (ODCB, 99.9%), chlorobenzene (CB, 99.9%) were purchased from Sigma Aldrich. Hole transport material-PDCBT was purchased from 1-Material. All reagents and chemicals were used as received without further purification.

### *Perovskite precursor solutions:*

CH<sub>3</sub>NH<sub>3</sub>PbI<sub>3-x</sub>Cl<sub>x</sub> perovskite precursor solutions were prepared by mixing MAI, PbI<sub>2</sub> and PbCl<sub>2</sub> with a molar ratio of 1.4:1.25:0.15 in a mixed solvent of GBL: DMSO = 7:3 (v:v) with a slight amount of excessive PbI<sub>2</sub> and stirred at 55 °C for 12 hours in a N<sub>2</sub>-filled glove box.

### *Sample preparation and device fabrication:*

PEN/ITO substrates were sequentially cleaned by sonication with distilled water, isopropanol, ethanol and then treated with ultraviolet-ozone plasma before spin-coating of the PEDOT:PSS (Clevios 4083). The PEDOT:PSS (Clevios 4083) solution were spin-coated on the PEN/ITO substrates at 4000 rpm for 60 s, and then annealed on a hotplate at 120°C for 15 min. After depositing the PEDOT:PSS layer, an additional hole transport layer PDCBT was spin-coated at 5000 rpm for 50 s. In order to improve the wettability of the perovskite solution on the PDCBT layer, a modified layer was spin coated by a continuous two-step spin-coating method process at 4000 rpm for 20

and 10 s. During the first spin-coating step, 150  $\mu\text{L}$  GBL was dripped on top of the PDCBT layer, and during the second spin-coating step, 50  $\mu\text{L}$  CB was spin-coated. The perovskite layer was deposited by a continuous two-step spin-coating method process at 1000 rpm and 4000 rpm for 10 and 31 s, respectively. During the second spin-coating step, 400  $\mu\text{L}$  CB was dripped on top of the perovskite film. Then, the flexible samples were annealed at 100°C for 10 min and cooled down to room temperature on a glass Petri dish. For the device fabrication, 60  $\mu\text{L}$  PC<sub>61</sub>BM solution was deposited at 3000 rpm for 60 s on top of the perovskite film. Finally, it was sequentially deposited PEI (0.05 wt. % in isopropanol) layer at 5000 rpm for 30 s and 70 nm silver electrodes by vacuum thermal evaporation under a vacuum of  $5 \times 10^{-5}$  Pa. The working area of the device is 0.038 cm<sup>2</sup>.

#### *Device characterization:*

Self-built quantum efficiency test system was used to test the responsivity and detectivity. The response speed was studied by an oscilloscope (MSO58, Tektronix) cooperated with a chopper. Surface morphologies of perovskite films were performed using SEM (JSM-6700F, JEOL). UV-vis spectra were conducted by a UV-vis spectrometer (UV-2600, Shimadzu). XRD measurements were obtained using an X-ray diffractometer (Empyrean, PANalytical). Self-built optical path for the linearly/circularly polarized photoexcitation-modulated photocurrent experiments is schematically shown in Figure S3. The excitation light source is 635 nm continuous-wave (CW) laser. The angle of quarter wave plate is adjusted to convert linearly polarized light and circularly polarized light, and the photocurrent are monitored by the source meter. Magneto-photocurrent measurements (Electrical transport measurement system, Model EM7, East Changing Technologies) were performed by recording photocurrent as a function of magnetic field. Steady and transient fluorescence

spectroscopic measurements were performed using a fluorescence spectrophotometer (Fluorolog-3, Horiba Scientific). Measurement of impedance spectrum was performed using impedance analyzer (E4990A, Keysight). The film thickness was measured by an ellipsometer (RC2-X, J.A. Woollam Co.).

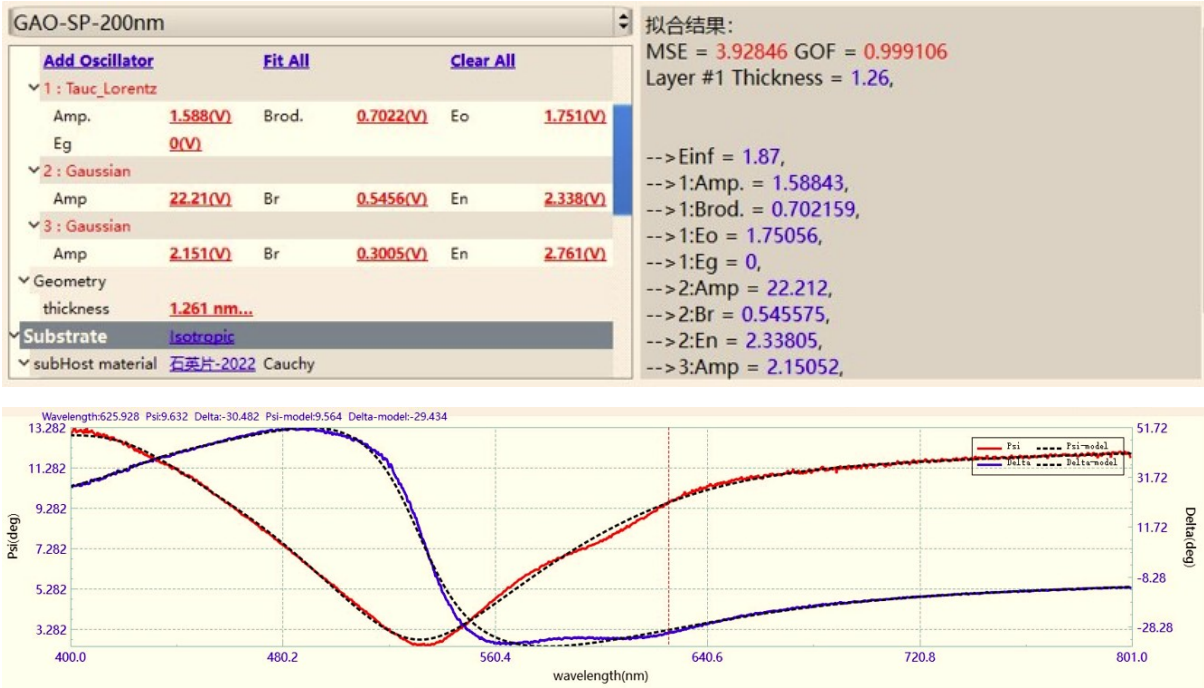

**Figure S1.** The thicknesses of PDCBT layer, which was measured by an ellipsometer.

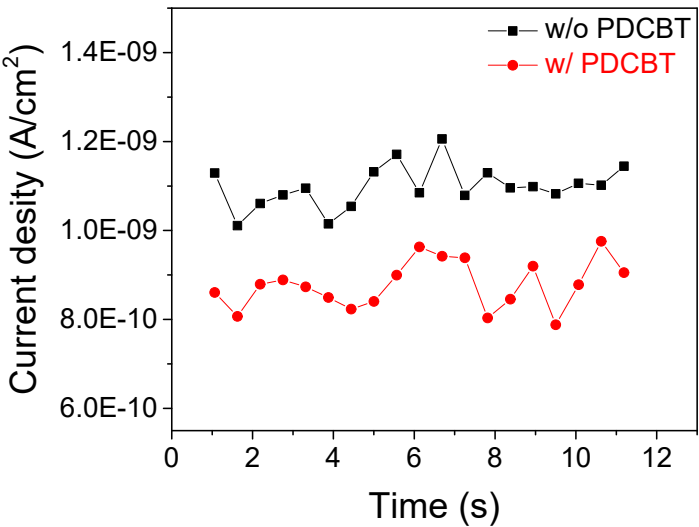

**Figure S2.** Dark current density under zero bias of MAPbI<sub>3-x</sub>Cl<sub>x</sub>-based FSPPD

with/without PDCBT layer.

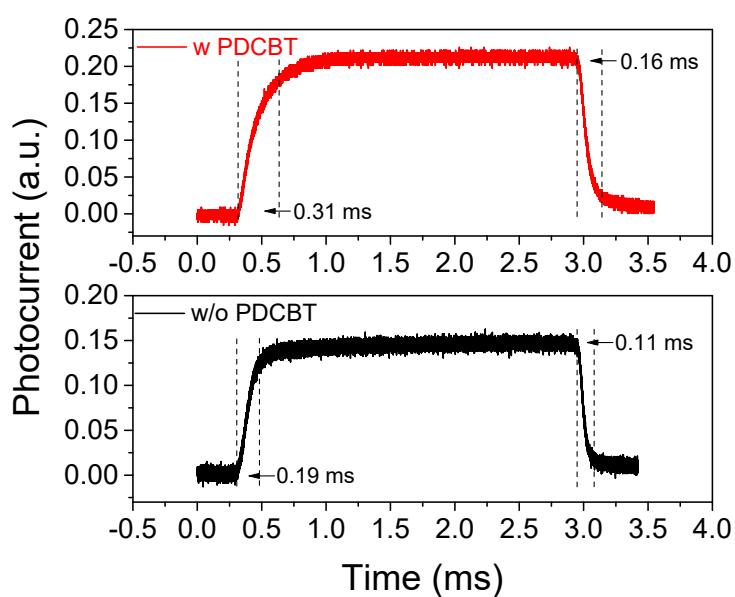

**Figure S3.** The rise time/decay time for FSPPD with/without PDCBT layer. The rise time of FSPPD was calculated by the time interval for the photocurrent to reach 90% of its highest value, while the decay time was calculated by the time interval for the photocurrent to fall 10% of its highest value.

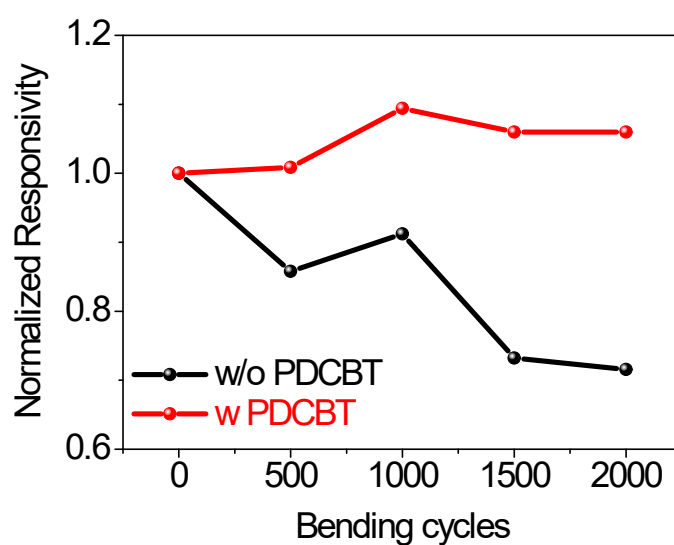

**Figure S4.** Normalized responsivity of MAPbI<sub>3-x</sub>Cl<sub>x</sub>-based FSPPD as a function of

bending cycles with bending radius of 5 mm.

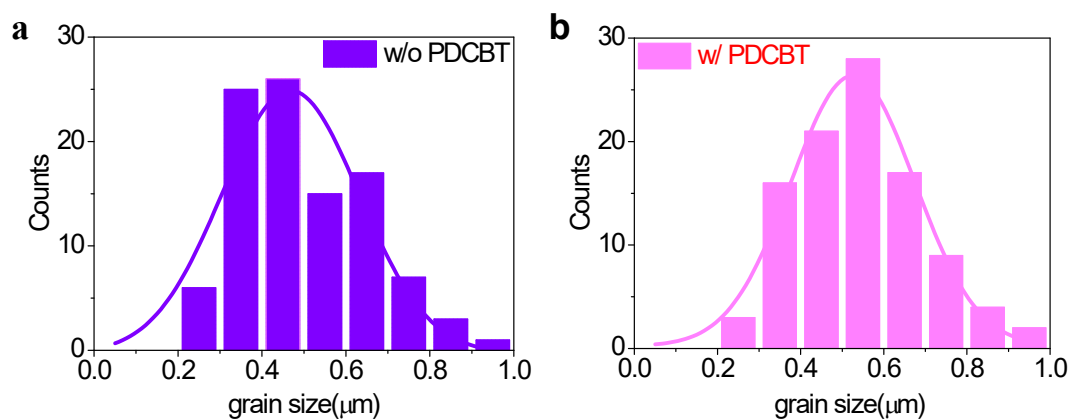

**Figure S5.** Grain size distribution histogram of MAPbI<sub>3-x</sub>Cl<sub>x</sub> film prepared (a) without PDCBT and (b) with PDCBT, obtained by the top view of SEM images.

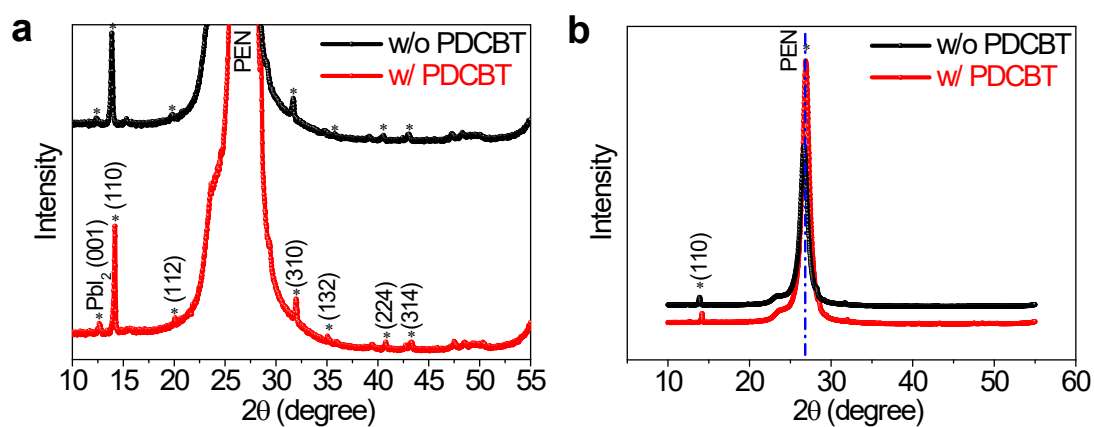

**Figure S6.** XRD patterns of MAPbI<sub>3-x</sub>Cl<sub>x</sub> film prepared with/without PDCBT (a) excluding and (b) including PEN peak.

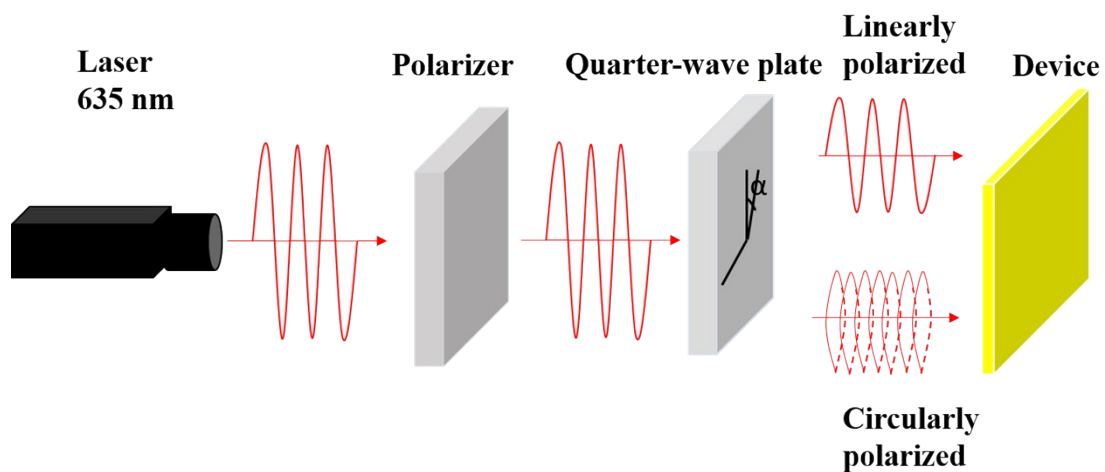

**Figure S7.** Experimental setup for the linear/circular photoexcitation-modulated photocurrent measurements.

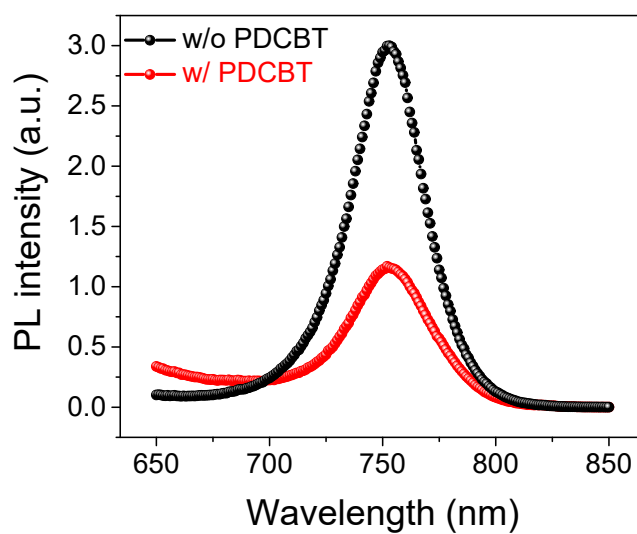

**Figure S8.** PL spectra of MAPbI<sub>3-x</sub>Cl<sub>x</sub> films prepared with/without PDCBT.

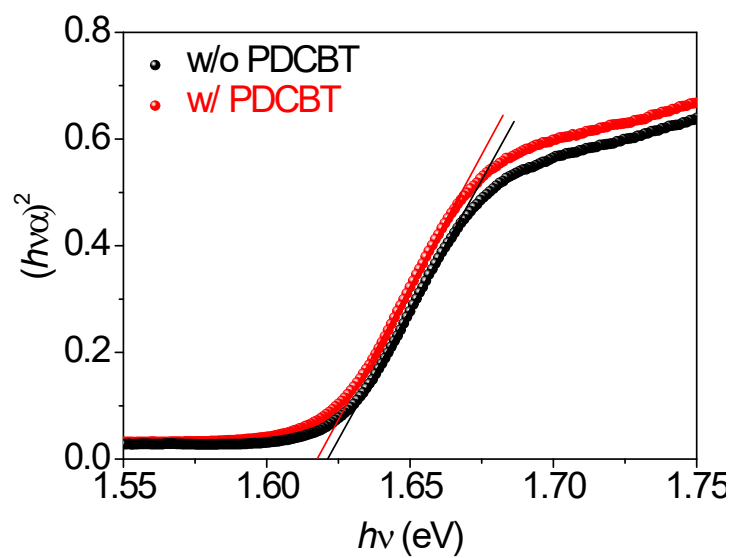

**Figure S9.** The band edges of  $\text{MAPbI}_{3-x}\text{Cl}_x$  film prepared with/without PDCBT determined from Tauc plots.

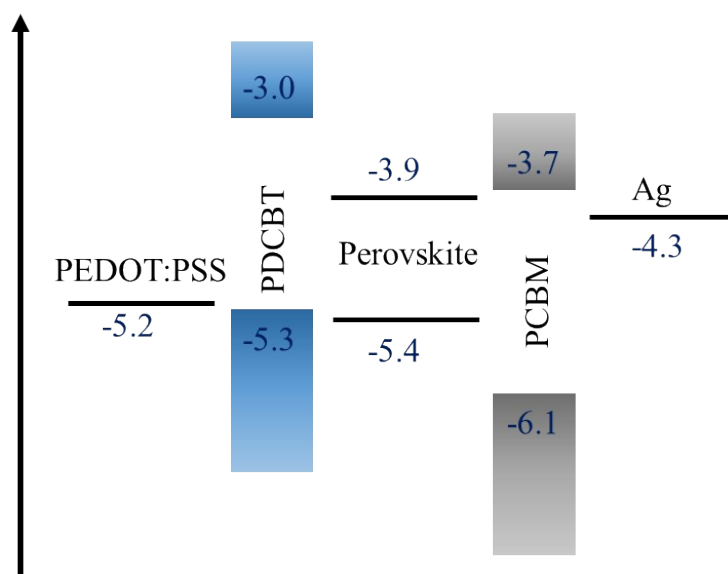

**Figure S10.** Energy level diagram of the FSPPD with PDCBT.
